# Supplementary material
Source: publisher figshare collection journal article supplement (https://asha.figshare.com/articles/dataset/_/14810484)
Supplement: Supplementary file 1 [file 1]

**Supplemental Material S1.** Mean (standard deviation) of demographic measures of children by language status and age.

| Language Status & Age      | N  | Gender                  | Age in Months | SES <sup>b</sup> | Concepts and Directions <sup>c</sup> | Recalling Sentences (in Contexts) <sup>d</sup> | CELF-P/CELF-3 <sup>e</sup> |
|----------------------------|----|-------------------------|---------------|------------------|--------------------------------------|------------------------------------------------|----------------------------|
| <i>Typical Language</i>    |    |                         |               |                  |                                      |                                                |                            |
| 4-Year-Olds                | 46 | 22 G, 24 B <sup>a</sup> | 55.65 (3.27)  | 47.38 (13.58)    | 11.07 (3.31)                         | 10.07 (2.46)                                   | --                         |
| 5-Year-Olds                | 49 | 24 G, 25 B              | 66.02 (3.20)  | 46.64 (12.12)    | 10.73 (2.65)                         | 10.00 (2.81)                                   | --                         |
| 6-Year-Olds                | 48 | 22 G, 26 B              | 78.77 (3.53)  | 48.31 (14.75)    | 11.60 (3.06)                         | 11.81 (3.30)                                   | --                         |
| 7-Year-Olds                | 48 | 24 G, 24 B              | 90.25 (3.32)  | 45.13 (13.65)    | 12.13 (3.29)                         | 11.68 (2.80)                                   | --                         |
| 8-Year-Olds                | 49 | 25 G, 24 B              | 102.92 (3.37) | 45.04 (11.55)    | 12.16 (2.95)                         | 10.94 (2.73)                                   | --                         |
| 9-Year-Olds                | 47 | 23 G, 24 B              | 113.81 (3.49) | 48.79 (12.04)    | 11.74 (2.82)                         | 11.06 (2.63)                                   | --                         |
| <i>Language Impairment</i> |    |                         |               |                  |                                      |                                                |                            |
| 4-Year-Olds                | 11 | 3 G, 8 B                | 54.73 (4.10)  | 47.17 (10.80)    | 4.45 (2.73)                          | 5.55 (1.13)                                    | 77.09 (8.99)               |
| 5-Year-Olds                | 14 | 6 G, 8 B                | 64.86 (3.21)  | 46.52 (12.00)    | 5.00 (2.88)                          | 4.43 (1.28)                                    | 76.21 (11.35)              |
| 6-Year-Olds                | 10 | 4 G, 6 B                | 80.20 (2.44)  | 40.26 (13.97)    | 5.60 (1.84)                          | 5.30 (2.31)                                    | 79.00 (8.73)               |
| 7-Year-Olds                | 13 | 3 G, 10 B               | 90.62 (2.57)  | 42.42 (13.30)    | 6.38 (2.36)                          | 4.31(1.49)                                     | 74.00 (11.05)              |
| 8-Year-Olds                | 15 | 5 G, 10 B               | 104.00 (3.16) | 42.42 (7.40)     | 7.53 (2.50)                          | 5.20 (1.82)                                    | 77.33 (12.04)              |
| 9-Year-Olds                | 9  | 4 G, 5 B                | 113.78 (2.64) | 48.71 (9.66)     | 8.00 (2.69)                          | 5.44 (2.07)                                    | 72.78 (11.70)              |

Note. a. G = girl; B = boy.

b. SES = socioeconomic status as measured by the Blishen Scales (Blishen et al., 1987).

c. The standard score ( $M = 10$ ,  $SD = 3$ ) was reported for the Concepts and Directions subtest in the CELF-P or CELF-3.

d. For 4- and 5-year-olds, the standard score ( $M = 10$ ,  $SD = 3$ ) was reported for the Recalling Sentences in Context subtest in the CELF-P were reported. For 6-year-olds or older, the standard score ( $M = 10$ ,  $SD = 3$ ) was reported for the Recalling Sentences subtest in the CELF-3.

e. CELF-P = Clinical Evaluation of Language Fundamentals–Preschool (Wiig et al., 1992); CELF-3 = Clinical Evaluation of Language Fundamentals–Third Edition (Semel et al., 1995). The standard scores of Total Language Composites ( $M = 100$ ,  $SD = 15$ ) were reported for the LI group using the manuals of the CELF-P or the CELF-3. No Total Language Composites were reported for children with TL because they were administered only the Concepts and Directions subtest and the Recalling Sentences (in Contexts) subtest.
