# Supplementary material
Source: publisher figshare collection journal article supplement (https://asha.figshare.com/articles/dataset/_/14810484)
Supplement: Supplementary file 2 [file 1]

**Supplemental Material S2.** Mean (standard deviation) of grammatical measures by language status and age ( $N = 359$ ).

| <b>Language Status &amp; Age</b> | <b>FVMC</b>   | <b>PGU</b>    | <b>Clausal Density</b> |
|----------------------------------|---------------|---------------|------------------------|
| <i>Typical Language</i>          |               |               |                        |
| 4-Year-Old                       | 94.24 (8.50)  | 80.53 (12.26) | 1.26 (0.14)            |
| 5-Year-Old                       | 95.93 (9.67)  | 83.75 (15.18) | 1.27 (0.20)            |
| 6-Year-Old                       | 97.52 (3.13)  | 90.75 (6.70)  | 1.28 (0.10)            |
| 7-Year-Old                       | 98.95 (1.74)  | 92.18 (5.56)  | 1.36 (0.15)            |
| 8-Year-Old                       | 98.42 (2.06)  | 94.90 (3.51)  | 1.41 (0.12)            |
| 9-Year-Old                       | 98.99 (1.24)  | 93.94 (4.09)  | 1.44 (0.14)            |
| <i>Language Impairment</i>       |               |               |                        |
| 4-Year-Old                       | 60.14 (23.77) | 34.90 (23.80) | 0.92 (0.35)            |
| 5-Year-Old                       | 71.50 (24.83) | 53.35 (20.32) | 1.12 (0.29)            |
| 6-Year-Old                       | 80.75 (18.84) | 65.90 (18.89) | 1.18 (0.14)            |
| 7-Year-Old                       | 81.29 (19.26) | 68.26 (20.60) | 1.21 (0.14)            |
| 8-Year-Old                       | 86.71 (18.54) | 77.80 (16.38) | 1.26 (0.10)            |
| 9-Year-Old                       | 92.76 (7.40)  | 83.14 (8.00)  | 1.33 (0.10)            |

*Note.* FVMC = finite verb morphology composite; PGU = percent grammatical utterances.
